# Supplementary material
Source: publisher figshare collection journal article supplement (https://sage.figshare.com/ndownloader/files/21672324)
Supplement: Supplementary file 1 [file 21672324]

**************** DESCRIPTIVE STATISTICS ***********************

* Figure 2
* use "Replication Data - Shifting Targets.dta"
drop if location=="Rwanda" & year==1994 & postconflict==0
collapse (sum) DVdeaths_all DVnwdeaths_all DVnwdeaths_wp DVnwdeaths_oa DVnwdeaths_osv_wp DVnwdeaths_osv_oa , by(episodenum conflictid ccode location postconflict year territory_name)
egen meanDVallong = mean(DVdeaths_all) if postconflict==0
egen meanDVnwallong = mean(DVnwdeaths_all) if postconflict==0
egen meanDVwpong = mean(DVnwdeaths_wp) if postconflict==0
egen meanDVoaong = mean(DVnwdeaths_oa) if postconflict==0
egen meanDVallpost = mean(DVdeaths_all) if postconflict==1
egen meanDVnwallpost = mean(DVnwdeaths_all) if postconflict==1
egen meanDVwppost = mean(DVnwdeaths_wp) if postconflict==1
egen meanDVoapost = mean(DVnwdeaths_oa) if postconflict==1
graph hbar DVnwdeaths_oa DVnwdeaths_wp , over(postconflict, relabel(1 "During war" 2 "Postwar")) stack legend(position(6) col(2) label(1 "Other actors") label(2 "Warring parties")) blabel(bar)


**************** MAIN RESULTS ******************
* use "Replication Data - Shifting Targets.dta"

* Table 1 
* With controls
nbreg DVnwdeaths_all IVluntroops1000 IVlunpolice1000 IVlunobservers1000 CTlncumdeaths_all CTlnmeanall_l2yr CTagreement CTfact CTtime1 CTtime2 CTtime3 if postconflict==1, cluster(episodenum)
eststo mod1
* PKO-only
nbreg DVnwdeaths_all IVluntroops1000 IVlunpolice1000 IVlunobservers1000 CTlncumdeaths_all CTlnmeanall_l2yr CTagreement CTfact CTtime1 CTtime2 CTtime3 if postconflict==1 & IVlunpresence==1, cluster(episodenum)
eststo mod2
* Matched on troops
nbreg DVnwdeaths_all IVluntroops1000 IVlunpolice1000 IVlunobservers1000 CTlncumdeaths_all CTlnmeanall_l2yr CTagreement CTfact CTtime1 CTtime2 CTtime3 if postconflict==1 & match3a==1 [iweight=cem_weights3a], cluster(episodenum)
eststo mod3a
* Matched on police
nbreg DVnwdeaths_all IVluntroops1000 IVlunpolice1000 IVlunobservers1000 CTlncumdeaths_all CTlnmeanall_l2yr CTagreement CTfact CTtime1 CTtime2 CTtime3 if postconflict==1 & match3b==1 [iweight=cem_weights3b], cluster(episodenum)
eststo mod3b
* Fixed effects
xtset episodenum date
xtnbreg DVnwdeaths_all IVluntroops1000 IVlunpolice1000 IVlunobservers1000 CTtime1 CTtime2 CTtime3 if postconflict==1, fe
eststo mod4
esttab mod1 mod2 mod3a mod3b mod4 using temp.csv, se b(3) star(* 0.10 ** 0.05 *** 0.01) nogaps replace

* Table 2 
* All violence, warring parties
nbreg DVnwdeaths_wp IVluntroops1000 IVlunpolice1000 IVlunobservers1000 CTlncumdeaths_all CTlnmeanall_l2yr CTagreement CTfact CTtime1 CTtime2 CTtime3 if postconflict==1, cluster(episodenum)
eststo mod5
* All violence, other actors
nbreg DVnwdeaths_oa IVluntroops1000 IVlunpolice1000 IVlunobservers1000 CTlncumdeaths_all CTlnmeanall_l2yr CTagreement CTfact CTtime1 CTtime2 CTtime3 if postconflict==1, cluster(episodenum)
eststo mod6
* OSV, warring parties
nbreg DVnwdeaths_osv_wp IVluntroops1000 IVlunpolice1000 IVlunobservers1000 CTlncumdeaths_all CTlnmeanall_l2yr CTagreement CTfact CTtime1 CTtime2 CTtime3 if postconflict==1, cluster(episodenum)
eststo mod7
* OSV, other actors
nbreg DVnwdeaths_osv_oa IVluntroops1000 IVlunpolice1000 IVlunobservers1000 CTlncumdeaths_all CTlnmeanall_l2yr CTagreement CTfact CTtime1 CTtime2 CTtime3 if postconflict==1, cluster(episodenum)
eststo mod8
esttab mod5 mod6 mod7 mod8 using temp.csv, se b(3) star(* 0.10 ** 0.05 *** 0.01) nogaps replace

* Figure 3: Effect of UN police over time
nbreg DVnwdeaths_all IVluntroops1000 i.IVlunpolicebinary1000#c.CTtime1 IVlunobservers1000 CTlncumdeaths_all CTlnmeanall_l2yr CTagreement CTfact CTtime1 if postconflict==1, cluster(episodenum)
eststo modfig3
margins, dydx(i.IVlunpolicebinary1000) at(c.CTtime1=(1(1)60)) atmeans vsquish
marginsplot, recastci(rline) addplot(histogram CTtime1 if postconflict==1, percent  bcolor(none) yaxis(2) yscale(alt axis(2)) width(0.1)) below


**************** ROBUSTNESS TESTS ******************


** Robustness Table 1, Model 1
* DV count
nbreg DVnwcount_all IVluntroops1000 IVlunpolice1000 IVlunobservers1000 CTlncumdeaths_all CTlnmeanall_l2yr CTagreement CTfact CTtime1 CTtime2 CTtime3 if postconflict==1, cluster(episodenum)
* IV logged
nbreg DVnwdeaths_all IVlnluntroops IVlnlunpolice IVlnlunobservers CTlncumdeaths_all CTlnmeanall_l2yr CTagreement CTfact CTtime1 CTtime2 CTtime3 if postconflict==1, cluster(episodenum)
* Observer dummy
nbreg DVnwdeaths_all IVluntroops1000 IVlunpolice1000 IVlobsbinary CTlncumdeaths_all CTlnmeanall_l2yr CTagreement CTfact CTtime1 CTtime2 CTtime3 if postconflict==1, cluster(episodenum)
* 1 year postwar period
nbreg DVnwdeaths_all IVluntroops1000 IVlunpolice1000 IVlunobservers1000 CTlncumdeaths_all CTlnmeanall_l2yr CTagreement CTfact CTtime1 CTtime2 CTtime3 if postconflict==1 & CTtime1<=12, cluster(episodenum)
* 2 year postwar period
nbreg DVnwdeaths_all IVluntroops1000 IVlunpolice1000 IVlunobservers1000 CTlncumdeaths_all CTlnmeanall_l2yr CTagreement CTfact CTtime1 CTtime2 CTtime3 if postconflict==1 & CTtime1<=24, cluster(episodenum)
* Lagged DV
nbreg DVnwdeaths_all IVluntroops1000 IVlunpolice1000 IVlunobservers1000 CTlncumdeaths_all CTlnmeanall_l2yr CTagreement CTfact CTlDVdeaths_all CTtime1 CTtime2 CTtime3 if postconflict==1, cluster(episodenum)
* Cubic polynomial of time since last violent event (military/war battle or any form of non-civil war violence studied in this paper)
nbreg DVnwdeaths_all IVluntroops1000 IVlunpolice1000 IVlunobservers1000 CTlncumdeaths_all CTlnmeanall_l2yr CTagreement CTfact CTtimesince CTtimesince2 CTtimesince3 if postconflict==1, cluster(episodenum)
* Additional control variables 
nbreg DVnwdeaths_all IVluntroops1000 IVlunpolice1000 IVlunobservers1000 CTlncumdeaths_all CTlnmeanall_l2yr CTagreement CTfact CTpolyareabuffer CTtime1 CTtime2 CTtime3 if postconflict==1, cluster(episodenum)
nbreg DVnwdeaths_all IVluntroops1000 IVlunpolice1000 IVlunobservers1000 CTlncumdeaths_all CTlnmeanall_l2yr CTagreement CTfact i.CTregion CTtime1 CTtime2 CTtime3 if postconflict==1, cluster(episodenum)
nbreg DVnwdeaths_all IVluntroops1000 IVlunpolice1000 IVlunobservers1000 CTlncumdeaths_all CTlnmeanall_l2yr CTagreement CTfact CTvictory CTtime1 CTtime2 CTtime3 if postconflict==1, cluster(episodenum)
nbreg DVnwdeaths_all IVluntroops1000 IVlunpolice1000 IVlunobservers1000 CTlncumdeaths_all CTlnmeanall_l2yr CTagreement CTfact CTduration CTtime1 CTtime2 CTtime3 if postconflict==1, cluster(episodenum)
nbreg DVnwdeaths_all IVluntroops1000 IVlunpolice1000 IVlunobservers1000 CTlncumdeaths_all CTlnmeanall_l2yr CTagreement CTfact CTpkoong CTtime1 CTtime2 CTtime3 if postconflict==1, cluster(episodenum)
* Leave individual episodes out
levelsof episodenum if postconflict==1, local(episodenums)
foreach a of local episodenums {
nbreg DVnwdeaths_all IVluntroops1000 IVlunpolice1000 IVlunobservers1000 CTlncumdeaths_all CTlnmeanall_l2yr CTagreement CTfact CTtime1 CTtime2 CTtime3 if postconflict==1 & episodenum != `a', cluster(episodenum)
eststo model`a'
}
esttab model* using temp.csv, p b(2) star(* 0.1) nogaps replace


** Robustness Table 2, conflict-level fixed effects
* All violence, warring parties
xtnbreg DVnwdeaths_wp IVluntroops1000 IVlunpolice1000 IVlunobservers1000 CTtime1 CTtime2 CTtime3 if postconflict==1, fe
eststo mod5fe
* All violence, other actors
xtnbreg DVnwdeaths_oa IVluntroops1000 IVlunpolice1000 IVlunobservers1000 CTtime1 CTtime2 CTtime3 if postconflict==1, fe
eststo mod6fe
* OSV, warring parties
xtnbreg DVnwdeaths_osv_wp IVluntroops1000 IVlunpolice1000 IVlunobservers1000 CTtime1 CTtime2 CTtime3 if postconflict==1, fe
eststo mod7fe
* OSV, other actors
xtnbreg DVnwdeaths_osv_oa IVluntroops1000 IVlunpolice1000 IVlunobservers1000 CTtime1 CTtime2 CTtime3 if postconflict==1, fe
eststo mod8fe
esttab mod5fe mod6fe mod7fe mod8fe using temp.csv, se b(3) star(* 0.10 ** 0.05 *** 0.01) nogaps replace


**************** APPENDIX *****************

*** Matching Procedure
** Use "Data for Matching - Shifting Targets.dta" (a data version in which post-treatment control cases (cases in which peacekeepers were there but had then left) are dropped)
* Create CEM troop match and weights in sample 3a (where cases with troop deployments that are below 3000 cannot be controls)
keep if sample3a==1
* Table A2
imb CTlncumdeaths_all CTlnmeanall_l2yr CTagreement CTfact, treatment(troops3000)
cem CTlncumdeaths_all CTlnmeanall_l2yr CTagreement CTfact, treatment(troops3000)
rename cem_matched match3a
rename cem_weights cem_weights3a
* save separate data version 3a to merge back into main data
** Use "Data for Matching - Shifting Targets.dta"
* Create CEM police match and weights in sample 3b (where cases with police deployments that are below 400 cannot be controls)
keep if sample3b==1
* Table A3
imb CTlncumdeaths_all CTlnmeanall_l2yr CTagreement CTfact, treatment(police400)
cem CTlncumdeaths_all CTlnmeanall_l2yr CTagreement CTfact, treatment(police400)
rename cem_matched match3b
rename cem_weights cem_weights3b
* save separate data version 3b to merge back into main data

*** Matching on Predeployment Violence Levels
** Use "Data for Matching - Shifting Targets.dta" (a data version in which post-treatment control cases (cases in which peacekeepers were there but had then left) are dropped)
* Create troop match
keep if sample3a==1
imb lnDeplAverDeaths CTagreement CTfact, treatment(troops3000)
centile lnDeplAverDeaths, centile(10 20 30 40 50 60 70 80 90)
cem lnDeplAverDeaths (0.12 0.63 1.04 1.82 2.63 3.47 4.41 4.87) CTagreement(#0) CTfact(#0), treatment(troops3000)
tab cem_matched
rename cem_matched match_predeployment_a
rename cem_weights cem_weights_predeployment_a
* save separate data version 3a to merge back into main data
* Create police match
** Use "Data for Matching - Shifting Targets.dta"
keep if sample3b==1
imb lnDeplAverDeaths CTagreement CTfact, treatment(police400)
centile lnDeplAverDeaths, centile(10 20 30 40 50 60 70 80 90)
cem lnDeplAverDeaths (0.08 0.58 0.98 1.65 2.60 3.28 4.20 4.81) CTagreement(#0) CTfact(#0), treatment(police400)
tab cem_matched
rename cem_matched match_predeployment_b
rename cem_weights cem_weights_predeployment_b
* save separate data version 3b to merge back into main data

* Run the robustness tests with matching on pre-deployment violence levels
* use "Replication Data - Shifting Targets.dta"
nbreg DVnwdeaths_all IVluntroops1000 IVlunpolice1000 IVlunobservers1000 lnDeplAverDeaths CTagreement CTfact CTtime1 CTtime2 CTtime3 if postconflict==1 & match_predeployment_a ==1 [iweight= cem_weights_predeployment_a ], cluster(episodenum)
eststo troop
nbreg DVnwdeaths_all IVluntroops1000 IVlunpolice1000 IVlunobservers1000 lnDeplAverDeaths CTagreement CTfact CTtime1 CTtime2 CTtime3 if postconflict==1 & match_predeployment_b ==1 [iweight= cem_weights_predeployment_b ], cluster(episodenum)
eststo police
esttab troop police using temp.csv, se b(3) star(* 0.10 ** 0.05 *** 0.01) nogaps replace


* Figure A2: Substantive effect of UN police
sum IVlunpolice1000 if postconflict==1, detail
nbreg DVnwdeaths_all IVluntroops1000 IVlunpolice1000 IVlunobservers1000 CTlncumdeaths_all CTlnmeanall_l2yr CTagreement CTfact CTtime1 CTtime2 CTtime3 if postconflict==1, cluster(episodenum)
margins, at(IVlunpolice1000=(0(0.2)2)) atmeans vsquish
marginsplot, recastci(rline) addplot(histogram IVlunpolice1000 if postconflict==1 & IVlunpolice1000>0 & IVlunpolice1000<=2, percent  bcolor(none) yaxis(2) yscale(alt axis(2)) width(0.1)) below


* Figure A3, Table A4: Interacting troops and police
* Estimate effects
nbreg DVnwdeaths_all IVluntroops1000 IVlunpolicebinary1000 IVlunobservers1000 CTlncumdeaths_all CTlnmeanall_l2yr CTagreement CTfact CTtime1 CTtime2 CTtime3 if postconflict==1, cluster(episodenum)
nbreg DVnwdeaths_all IVluntroops1000 IVlunpolicebinary400 IVlunobservers1000 CTlncumdeaths_all CTlnmeanall_l2yr CTagreement CTfact CTtime1 CTtime2 CTtime3 if postconflict==1, cluster(episodenum)
* Interact Police binary with troop number: Does substantive number of police effect depend on number of troops?
nbreg DVnwdeaths_all c.IVluntroops1000##i.IVlunpolicebinary1000 IVlunobservers1000 CTlncumdeaths_all CTlnmeanall_l2yr CTagreement CTfact CTtime1 CTtime2 CTtime3 if postconflict==1, cluster(episodenum)
eststo inter1000
margins, dydx(i.IVlunpolicebinary1000) at(c.IVluntroops1000=(0(0.5)10)) atmeans vsquish
marginsplot, recastci(rline)
nbreg DVnwdeaths_all c.IVluntroops1000##i.IVlunpolicebinary400 IVlunobservers1000 CTlncumdeaths_all CTlnmeanall_l2yr CTagreement CTfact CTtime1 CTtime2 CTtime3 if postconflict==1, cluster(episodenum)
eststo inter400
margins, dydx(i.IVlunpolicebinary400) at(c.IVluntroops1000=(0(0.5)10)) atmeans vsquish
marginsplot, recastci(rline)
esttab inter1000 inter400 using temp.csv, se b(3) star(* 0.10 ** 0.05 *** 0.01) nogaps replace

* Table A5: UN and non-UN peacekeeping
nbreg DVnwdeaths_all IVluntroops1000 IVlunpolice1000 lnonuntroops1000 lnonunpolice1000 anyobservers CTlncumdeaths_all CTlnmeanall_l2yr CTagreement CTfact CTtime1 CTtime2 CTtime3 if postconflict==1 & year>=1993, cluster(episodenum)
eststo mod1
nbreg DVnwdeaths_all lalltroops1000 lallpolice1000 anyobservers CTlncumdeaths_all CTlnmeanall_l2yr CTagreement CTfact CTtime1 CTtime2 CTtime3 if postconflict==1 & year>=1993, cluster(episodenum)
eststo mod2
nbreg DVnwdeaths_wp IVluntroops1000 IVlunpolice1000 lnonuntroops1000 lnonunpolice1000 anyobservers CTlncumdeaths_all CTlnmeanall_l2yr CTagreement CTfact CTtime1 CTtime2 CTtime3 if postconflict==1 & year>=1993, cluster(episodenum)
eststo mod3
nbreg DVnwdeaths_wp lalltroops1000 lallpolice1000 anyobservers CTlncumdeaths_all CTlnmeanall_l2yr CTagreement CTfact CTtime1 CTtime2 CTtime3 if postconflict==1 & year>=1993, cluster(episodenum)
eststo mod4
nbreg DVnwdeaths_oa IVluntroops1000 IVlunpolice1000 lnonuntroops1000 lnonunpolice1000 anyobservers CTlncumdeaths_all CTlnmeanall_l2yr CTagreement CTfact CTtime1 CTtime2 CTtime3 if postconflict==1 & year>=1993, cluster(episodenum)
eststo mod5
nbreg DVnwdeaths_oa lalltroops1000 lallpolice1000 anyobservers CTlncumdeaths_all CTlnmeanall_l2yr CTagreement CTfact CTtime1 CTtime2 CTtime3 if postconflict==1 & year>=1993, cluster(episodenum)
eststo mod6
esttab mod1 mod2 mod3 mod4 mod5 mod6 using temp.csv, se b(3) star(* 0.10 ** 0.05 *** 0.01) nogaps replace

*** Temporal dynamics
* Figures A4 and A5: Boxplots deployment troops and police
graph box IVluntroops if everpostpko==1, over(CTtime1)
graph box IVlunpolice if everpostpko==1, over(CTtime1)
* Table A6: Early vs late postwar period
nbreg DVnwdeaths_all IVluntroops1000 IVlunpolice1000 IVlunobservers1000 CTlncumdeaths_all CTlnmeanall_l2yr CTagreement CTfact CTtime1 CTtime2 CTtime3 if postconflict==1 & CTtime1<=24, cluster(episodenum)
eststo mod1
nbreg DVnwdeaths_all IVluntroops1000 IVlunpolice1000 IVlunobservers1000 CTlncumdeaths_all CTlnmeanall_l2yr CTagreement CTfact CTtime1 CTtime2 CTtime3 if postconflict==1 & CTtime1>24, cluster(episodenum)
eststo mod2
nbreg DVnwdeaths_wp IVluntroops1000 IVlunpolice1000 IVlunobservers1000 CTlncumdeaths_all CTlnmeanall_l2yr CTagreement CTfact CTtime1 CTtime2 CTtime3 if postconflict==1 & CTtime1<=24, cluster(episodenum)
eststo mod3
nbreg DVnwdeaths_wp IVluntroops1000 IVlunpolice1000 IVlunobservers1000 CTlncumdeaths_all CTlnmeanall_l2yr CTagreement CTfact CTtime1 CTtime2 CTtime3 if postconflict==1 & CTtime1>24, cluster(episodenum)
eststo mod4
nbreg DVnwdeaths_oa IVluntroops1000 IVlunpolice1000 IVlunobservers1000 CTlncumdeaths_all CTlnmeanall_l2yr CTagreement CTfact CTtime1 CTtime2 CTtime3 if postconflict==1 & CTtime1<=24, cluster(episodenum)
eststo mod5
nbreg DVnwdeaths_oa IVluntroops1000 IVlunpolice1000 IVlunobservers1000 CTlncumdeaths_all CTlnmeanall_l2yr CTagreement CTfact CTtime1 CTtime2 CTtime3 if postconflict==1 & CTtime1>24, cluster(episodenum)
eststo mod6
esttab mod1 mod2 mod3 mod4 mod5 mod6 using temp.csv, se b(3) star(* 0.10 ** 0.05 *** 0.01) nogaps replace
* Table A7: UN police interacted with postwar time
esttab modfig3 using temp.csv, se b(3) star(* 0.10 ** 0.05 *** 0.01) nogaps replace
* Table A8: Police impact over time, separate regressions
nbreg DVnwdeaths_all IVluntroops1000 IVlunpolice1000 IVlunobservers1000 CTlncumdeaths_all CTlnmeanall_l2yr CTagreement CTfact CTtime1 if postconflict==1  & CTtime1<=12, cluster(episodenum)
eststo modyear1
nbreg DVnwdeaths_all IVluntroops1000 IVlunpolice1000 IVlunobservers1000 CTlncumdeaths_all CTlnmeanall_l2yr CTagreement CTfact CTtime1 if postconflict==1 & CTtime1>12 & CTtime1<=24, cluster(episodenum)
eststo modyear2
nbreg DVnwdeaths_all IVluntroops1000 IVlunpolice1000 IVlunobservers1000 CTlncumdeaths_all CTlnmeanall_l2yr CTagreement CTfact CTtime1 if postconflict==1 & CTtime1>24 & CTtime1<=36, cluster(episodenum)
eststo modyear3
nbreg DVnwdeaths_all IVluntroops1000 IVlunpolice1000 IVlunobservers1000 CTlncumdeaths_all CTlnmeanall_l2yr CTagreement CTfact CTtime1 if postconflict==1 & CTtime1>36 & CTtime1<=48, cluster(episodenum)
eststo modyear4
nbreg DVnwdeaths_all IVluntroops1000 IVlunpolice1000 IVlunobservers1000 CTlncumdeaths_all CTlnmeanall_l2yr CTagreement CTfact CTtime1 if postconflict==1 & CTtime1>48 & CTtime1<=60, cluster(episodenum)
eststo modyear5
esttab modyear1 modyear2 modyear3 modyear4 modyear5 using temp.csv, se b(3) star(* 0.10 ** 0.05 *** 0.01) nogaps replace
